# Supplementary material for: Thin interfacial film spontaneously produces hydrogen peroxide: mechanism and application for perfluorooctanoic acid degradation
Source: Royal Society of Chemistry journal article supplement (doi:10.1039/d1nj04791d), 2021-11-22
Supplement: d1nj04791d1.pdf [file d1nj04791d1.pdf]

## Supporting Information

# Thin interfacial film spontaneously produces hydrogen peroxide: mechanism and application on perfluorooctanoic acid degradation

*Wenxin Wang, <sup>b,c,#</sup> Hong Zhang, <sup>b,c,#</sup> Jie Jiang, <sup>b,c</sup> Yuwei He, <sup>b</sup> Jing He, <sup>b,c</sup> Junyu Liu, <sup>b</sup>*

*Kai Yu, <sup>b,c</sup> Qianhui Liu, <sup>b</sup> Lina Qiao, <sup>a,\*</sup>*

<sup>a</sup> Marine College, Shandong University (Weihai), Weihai, Shandong 264209 (China).

<sup>b</sup> School of Marine Science and Technology, Harbin Institute of Technology at Weihai, Weihai, Shandong 264209 (China).

<sup>c</sup> State Key Laboratory of Urban Water Resource and Environment, Harbin Institute of Technology, Harbin, Heilongjiang 150090 (China).

# These authors contribute equally to this work.

### Corresponding authors:

Lina Qiao: E-mail: qiaoln8023@163.com

## Contents

|                                                                                                                                 |   |
|---------------------------------------------------------------------------------------------------------------------------------|---|
| Figure S1. Scheme of droplet spray ionization mass spectrometry .....                                                           | 3 |
| Figure S2. Test strip immersed water (a) with H <sub>2</sub> O <sub>2</sub> and (b) without H <sub>2</sub> O <sub>2</sub> ..... | 3 |
| Figure S3. MS/MS spectrum of peaks at <i>m/z</i> 213 .....                                                                      | 3 |
| Figure S4. Mass spectrum of thin film at different reaction time .....                                                          | 4 |
| Figure S5. Comparison of relative abundance with and without H <sub>2</sub> O <sub>2</sub> .....                                | 4 |
| Figure S6. Photographs of the solution casted for thin film .....                                                               | 4 |
| Figure S7. Mass spectra of DMPO in bulk and thin films .....                                                                    | 5 |
| Figure S8. MS/MS spectrum of <i>m/z</i> 130 .....                                                                               | 5 |
| Table S1. Identification of products.....                                                                                       | 5 |

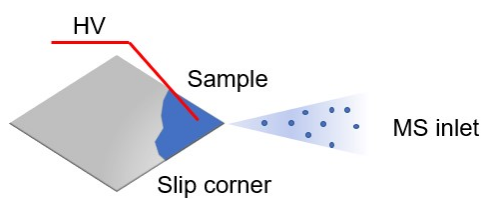

Figure S1. Scheme of droplet spray ionization mass spectrometry (DSI-MS)

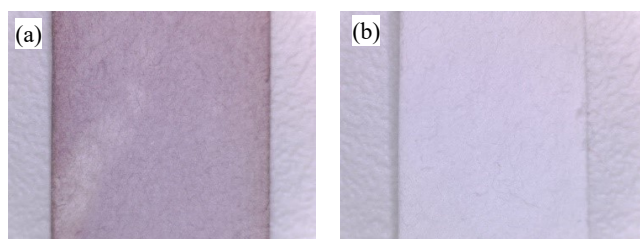

Figure S2. Photographs of the potassium iodide starch test strip immersed water (a) with  $\text{H}_2\text{O}_2$  and (b) without  $\text{H}_2\text{O}_2$

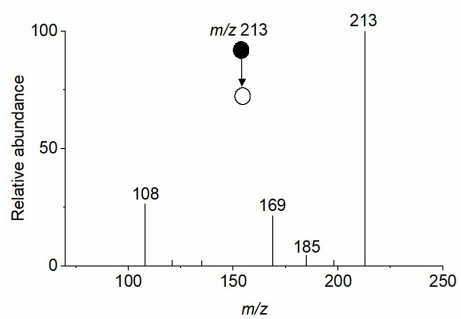

Figure S3. MS/MS spectrum of peaks at  $m/z$  213

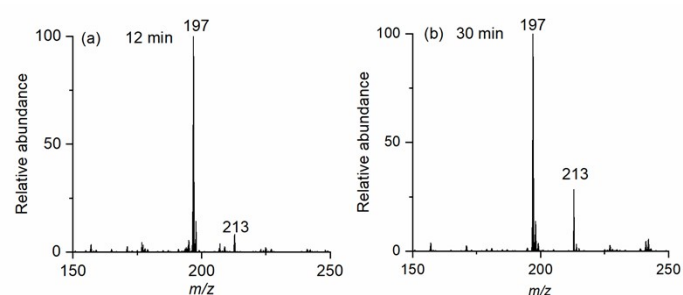

Figure S4. Mass spectrum of thin film containing 2-hydroxybenzophenone (100  $\mu\text{M}$ ) at different reaction time: (a) 12 min; (b) 30 min

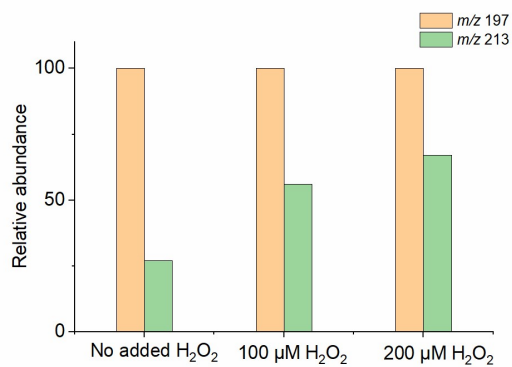

Figure S5. Comparison of relative abundance of 2-hydroxybenzophenone ( $m/z$  197) and oxidation product ( $m/z$  213) with and without added  $\text{H}_2\text{O}_2$  in thin film reactor

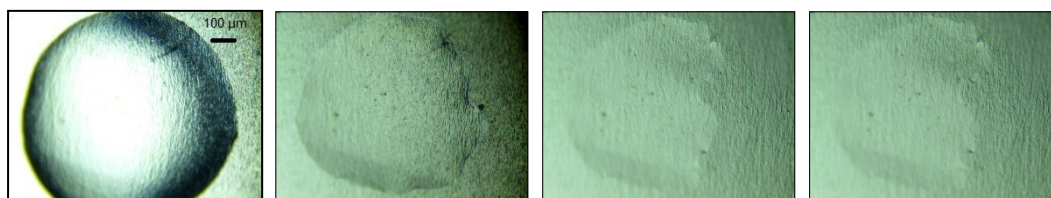

Figure S6. Photographs of the solution casted for thin film: (a) 0 min, (b) 7 min, (c) 10 min, (d) 30 min

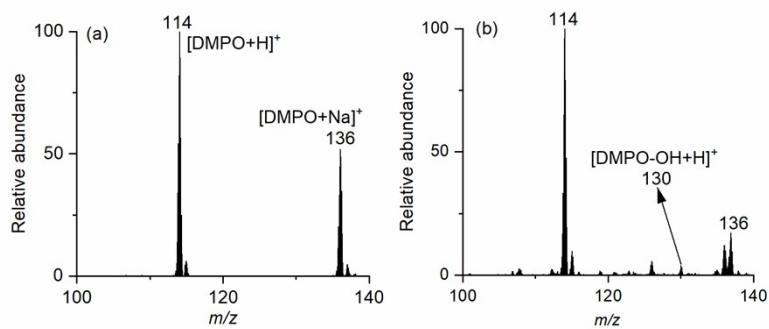

Figure S7. Mass spectra of (a) DMPO in bulk experiment and (b) DMPO in thin films

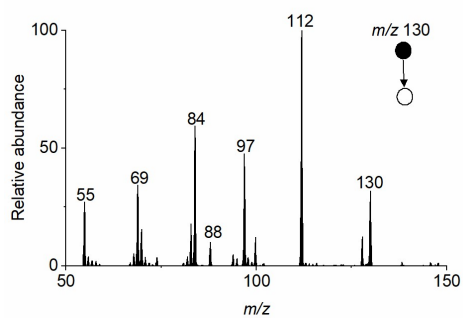

Figure S8. MS/MS spectrum of  $m/z$  130

Table S1. Identification of products obtained during PFOA degradation

| Detected ion | assignment         | formula                                              | Relative ratio<br>(30 min) |
|--------------|--------------------|------------------------------------------------------|----------------------------|
| $m/z$ 413    | [M-H] <sup>-</sup> | CF <sub>3</sub> (CF <sub>2</sub> ) <sub>6</sub> COOH | 40.1                       |
| $m/z$ 363    | [M-H] <sup>-</sup> | CF <sub>3</sub> (CF <sub>2</sub> ) <sub>5</sub> COOH | 32.5                       |
| $m/z$ 313    | [M-H] <sup>-</sup> | CF <sub>3</sub> (CF <sub>2</sub> ) <sub>4</sub> COOH | 46.3                       |
| $m/z$ 263    | [M-H] <sup>-</sup> | CF <sub>3</sub> (CF <sub>2</sub> ) <sub>3</sub> COOH | 41.4                       |
| $m/z$ 213    | [M-H] <sup>-</sup> | CF <sub>3</sub> (CF <sub>2</sub> ) <sub>2</sub> COOH | 84.5                       |
| $m/z$ 163    | [M-H] <sup>-</sup> | CF <sub>3</sub> (CF <sub>2</sub> ) <sub>1</sub> COOH | 100                        |
| $m/z$ 113    | [M-H] <sup>-</sup> | CF <sub>3</sub> COOH                                 | 74.5                       |
